# Supplementary material for: Influence of RVFV Infection on Olfactory Perception and Behavior in Drosophila melanogaster
Source: MDPI journal article supplement (doi:10.3390/pathogens12040558), 2023-04-05
Supplement: s1 [file s1]

## Supplements

**Table S1.** Averaged RVFV RNA copies from flies after locomotor activity assay.

| Treatment | dpi | Replicate No. | Copies Per Fly      | Average Copies Per Fly | SEM                 |
|-----------|-----|---------------|---------------------|------------------------|---------------------|
| mock      | 2   | 1             | no Cq               |                        |                     |
|           | 2   | 2             | no Cq               |                        |                     |
|           | 2   | 3             | no Cq               |                        |                     |
| mock      | 8   | 1             | no Cq               |                        |                     |
|           | 8   | 2             | no Cq               |                        |                     |
|           | 8   | 3             | no Cq               |                        |                     |
| RVFV      | 2   | 1             | $1.974 \times 10^6$ | $2.327 \times 10^6$    | $1.697 \times 10^5$ |
|           | 2   | 2             | $2.694 \times 10^6$ |                        |                     |
|           | 2   | 3             | $2.315 \times 10^6$ |                        |                     |
| RVFV      | 8   | 1             | $3.585 \times 10^7$ | $2.564 \times 10^7$    | $4.277 \times 10^6$ |
|           | 8   | 2             | $2.257 \times 10^7$ |                        |                     |
|           | 8   | 3             | $1.851 \times 10^7$ |                        |                     |

**Table S2.** Averaged RVFV RNA copies from flies after Y-maze assay with the odor 1-hexanol. bdl: below detection limit.

| Treatment | Dpi | Replicate No. | Copies Per Fly      | Average Copies Per Fly | SEM                 |
|-----------|-----|---------------|---------------------|------------------------|---------------------|
| mock      | 2   | 1             | no Cq               |                        |                     |
|           | 2   | 2             | bdl                 |                        |                     |
|           | 2   | 3             | no Cq               |                        |                     |
|           | 2   | 4             | no Cq               |                        |                     |
|           | 2   | 5             | no Cq               |                        |                     |
| mock      | 8   | 1             | no Cq               |                        |                     |
|           | 8   | 2             | no Cq               |                        |                     |
|           | 8   | 3             | no Cq               |                        |                     |
|           | 8   | 4             | no Cq               |                        |                     |
|           | 8   | 5             | no Cq               |                        |                     |
| RVFV      | 2   | 1             | $3.310 \times 10^6$ | $3.929 \times 10^6$    | $4.668 \times 10^5$ |
|           | 2   | 2             | $5.823 \times 10^6$ |                        |                     |
|           | 2   | 3             | $3.399 \times 10^6$ |                        |                     |
|           | 2   | 4             | $2.879 \times 10^6$ |                        |                     |
|           | 2   | 5             | $4.236 \times 10^6$ |                        |                     |
| RVFV      | 8   | 1             | $7.271 \times 10^7$ | $6.706 \times 10^7$    | $9.805 \times 10^6$ |
|           | 8   | 2             | $2.876 \times 10^7$ |                        |                     |
|           | 8   | 3             | $6.067 \times 10^7$ |                        |                     |
|           | 8   | 4             | $7.947 \times 10^7$ |                        |                     |
|           | 8   | 5             | $9.370 \times 10^7$ |                        |                     |

**Table S3.** Averaged RVFV RNA copies from flies after Y-maze assay with the odor apple cider vinegar (ACV). bdl: below detection limit.

| Treatment | Dpi | Replicate No. | Copies Per Fly      | Average Copies Per Fly | SEM                 |
|-----------|-----|---------------|---------------------|------------------------|---------------------|
| mock      | 2   | 1             | no Cq               |                        |                     |
|           | 2   | 2             | no Cq               |                        |                     |
|           | 2   | 3             | no Cq               |                        |                     |
|           | 2   | 4             | no Cq               |                        |                     |
|           | 2   | 5             | no Cq               |                        |                     |
| mock      | 8   | 1             | no Cq               |                        |                     |
|           | 8   | 2             | bdl                 |                        |                     |
|           | 8   | 3             | no Cq               |                        |                     |
|           | 8   | 4             | no Cq               |                        |                     |
|           | 8   | 5             | no Cq               |                        |                     |
| RVFV      | 2   | 1             | $4.630 \times 10^6$ | $3.567 \times 10^6$    | $2.744 \times 10^5$ |
|           | 2   | 2             | $3.409 \times 10^6$ |                        |                     |
|           | 2   | 3             | $3.370 \times 10^6$ |                        |                     |
|           | 2   | 4             | $2.744 \times 10^6$ |                        |                     |
|           | 2   | 5             | $3.681 \times 10^6$ |                        |                     |
| RVFV      | 8   | 1             | $8.903 \times 10^7$ | $4.366 \times 10^7$    | $1.080 \times 10^7$ |
|           | 8   | 2             | $3.263 \times 10^7$ |                        |                     |
|           | 8   | 3             | $2.319 \times 10^7$ |                        |                     |
|           | 8   | 4             | $2.623 \times 10^7$ |                        |                     |
|           | 8   | 5             | $4.723 \times 10^7$ |                        |                     |

**Table S4.** Number of RVFV RNA copies from individual flies after EAG measurement.

| Treatment | Dpi | Replicate No. | Copies Per Fly      | Average Copies Per Fly | SEM                 |
|-----------|-----|---------------|---------------------|------------------------|---------------------|
| mock      | 1   | 1             | no Cq               |                        |                     |
|           | 1   | 2             | no Cq               |                        |                     |
|           | 1   | 3             | no Cq               |                        |                     |
|           | 1   | 4             | no Cq               |                        |                     |
|           | 1   | 5             | no Cq               |                        |                     |
| mock      | 6   | 1             | no Cq               |                        |                     |
|           | 6   | 2             | no Cq               |                        |                     |
|           | 7   | 3             | no Cq               |                        |                     |
|           | 6   | 4             | no Cq               |                        |                     |
|           | 7   | 5             | no Cq               |                        |                     |
| RVFV      | 1   | 1             | $2.442 \times 10^4$ | $1.720 \times 10^5$    | $4.680 \times 10^4$ |
|           | 1   | 2             | $1.663 \times 10^4$ |                        |                     |
|           | 1   | 3             | $1.726 \times 10^5$ |                        |                     |
|           | 1   | 4             | $1.190 \times 10^5$ |                        |                     |
|           | 1   | 5             | $2.902 \times 10^5$ |                        |                     |
|           | 1   | 6             | $2.849 \times 10^4$ |                        |                     |
|           | 1   | 7             | $4.052 \times 10^5$ |                        |                     |
|           | 1   | 8             | $3.805 \times 10^5$ |                        |                     |
|           | 1   | 9             | $2.758 \times 10^5$ |                        |                     |
|           | 1   | 10            | $7.467 \times 10^3$ |                        |                     |
| RVFV      | 6   | 1             | $2.552 \times 10^3$ | $2.336 \times 10^7$    | $1.137 \times 10^7$ |
|           | 6   | 2             | $1.056 \times 10^7$ |                        |                     |
|           | 7   | 3             | $1.353 \times 10^8$ |                        |                     |
|           | 7   | 4             | $1.291 \times 10^7$ |                        |                     |
|           | 6   | 5             | $4.460 \times 10^7$ |                        |                     |
|           | 6   | 6             | $4.591 \times 10^6$ |                        |                     |
|           | 6   | 7             | $3.830 \times 10^6$ |                        |                     |
|           | 7   | 8             | $8.958 \times 10^6$ |                        |                     |
|           | 7   | 9             | $1.088 \times 10^4$ |                        |                     |
|           | 7   | 10            | $3.002 \times 10^7$ |                        |                     |
|           | 7   | 11            | $6.113 \times 10^6$ |                        |                     |

**Table S5.** Sequence references used for dNOS primer creation.

|   |                  |                                                                                                                                                                                     |
|---|------------------|-------------------------------------------------------------------------------------------------------------------------------------------------------------------------------------|
| 1 | Sequence         | <i>Drosophila melanogaster</i> nitric oxide synthase, transcript variant A (Nos), mRNA                                                                                              |
|   | NCBI ref. no.    | NM_078817.4                                                                                                                                                                         |
|   | authors          | Matthews, B.B.; Dos Santos, G.; Crosby, M.A.; Emmert, D.B.; St Pierre, S.E.; Gramates, L.S.; Zhou, P.; Schroeder, A.J.; Falls, K.; Strelets, V.; Russo, S.M. and Gelbart, W.M. [60] |
| 2 | Sequence         | <i>Drosophila melanogaster</i> nitric oxide synthase, transcript variant F (Nos), mRNA                                                                                              |
|   | NCBI ref. no.    | NM_001032069.2                                                                                                                                                                      |
|   | authors          | Matthews, B.B.; Dos Santos, G.; Crosby, M.A.; Emmert, D.B.; St Pierre, S.E.; Gramates, L.S.; Zhou, P.; Schroeder, A.J.; Falls, K.; Strelets, V.; Russo, S.M. and Gelbart, W.M. [60] |
| 3 | Sequence         | <i>Drosophila melanogaster</i> nitric oxide synthase, transcript variant K (Nos), mRNA                                                                                              |
|   | NCBI ref. no.    | NM_001032072.2                                                                                                                                                                      |
|   | authors          | Matthews, B.B.; Dos Santos, G.; Crosby, M.A.; Emmert, D.B.; St Pierre, S.E.; Gramates, L.S.; Zhou, P.; Schroeder, A.J.; Falls, K.; Strelets, V.; Russo, S.M. and Gelbart, W.M. [60] |
| 4 | Sequence         | <i>Drosophila melanogaster</i> nitric oxide synthase gene, complete cds                                                                                                             |
|   | NCBI ref. no.    | AH009071.2                                                                                                                                                                          |
|   | utilised section | exon 16                                                                                                                                                                             |
|   | authors          | Stasiv, Y., Regulski, M.; Kuzin, B.; Tully, T. and Enikolopov, G. [61]                                                                                                              |

**Table S6.** Selected conserved *dNOS* sequence section. **A** Forward sequences of the RT-qPCR amplicons with dNOS primer. Forward primer sequence labelled yellow and reverse primer sequence labelled purple. The product length is 332 bp. **B** Reference sequence from selected *dNOS* section labelled orange, consensus sequence head *D. melanogaster cnbw* labelled blue, sequence body *D. melanogaster cnbw* labelled green. Mutations are marked in yellow.

|          |                                                                                                                                                                                                                                                                                                                                                                                                                                                                                                                                                                                                                                                                                                                                                                                                                                                             |
|----------|-------------------------------------------------------------------------------------------------------------------------------------------------------------------------------------------------------------------------------------------------------------------------------------------------------------------------------------------------------------------------------------------------------------------------------------------------------------------------------------------------------------------------------------------------------------------------------------------------------------------------------------------------------------------------------------------------------------------------------------------------------------------------------------------------------------------------------------------------------------|
| <b>A</b> | 5'-GGCGAATAAGGGATCCCTGGACAGCAGTTTATCCAAGTACCACAACAAGAAGGTGCACTGCTGCAAGGC<br>GAAGGCGAAGCCCCACAATTTGACCCGTTTGAGTGAGGGAGCCAAGACAACGATGCTGCTGGAGATCTGTG<br>CACCTGGCTTGGAGTACGAGCCGGGTGATCATGTGGGCATCTTCCGGCGAATCGAACGGAACGGTCGAC<br>GGACTGCTAAATCGACTGGTGGGTGTGGATAATCCCGACGAGGTGCTGCAGTTGCAATTGCTAAAGGAAAA<br>GCAGACATCGAATGGTATATTCAAGTGCTGGGAGCCGCACGACAAAATAC-3'                                                                                                                                                                                                                                                                                                                                                                                                                                                                                            |
| <b>B</b> | GGCGAAGCCCCACAATTTGACCCGTTTGAGTGAGGGAGCCAAGACAACGATGCTGCTGGAGATCTGTGCACC<br>GGCGAAGCCCCACAATTTGACCCGTTTGAGTGAGGGAGCCAAGACAACGATGCTGCTGGAGATCTGTGCACC<br>GGCGAAGCCCCACAATTTGACCCGTTTGAGTGAGGGAGCCAAGACAACGATGCTGCTGGAGATCTGTGCRCC<br><br>TGGCTTGGAGTACGAGCCGGGTGATCATGTGGGCATCTTCCGGCGAATCGAACGGAACTGGTCGACGGACT<br>TGGCTTGGAGTACGAGCCGGGTGATCATGTGGGCATCTTCCGGCGAATCGAACGGAACTGGTCGACGGACT<br>TGGCTTGGAGTACGAGCCGGGTGATCATGTGGGCATCTTCCGGCGAATCGAACGGAACTGGTCGACGGACT<br><br>GCTAAATCGACTGGTGGGTGTGGATAATCCCGACGAGGTGCTGCAGTTGCAATTGCTAAAGGAAAAGCAGAC<br>GCTAAATCGACTGGTGGGTGTGGATAATCCCGACGAGGTGCTGCAGTTGCAATTGCTAAAGGAAAAGCAGAC<br>GCTAAATCGACTGRTGGGTGTGGATAATCCCGACGAGGTGCTGCAGTTGCAATTGCTAAAGGAAAAGCAGAC<br><br>ATCGAATGGTATATTCAAGTGCTGGGAGCCGCACGACAAAAT<br>ATCGAATGGTATATTCAAGTGCTGGGAGCCGCACGACAAAAT<br>ATCGAATGGTATATTCAAGTGCTGGGAGCCGCACGACAAAAT |
